# Supplementary material for: A Combined Syndromic Approach to Examine Viral, Bacterial, and Parasitic Agents among Febrile Patients: A Pilot Study in Kilombero, Tanzania
Source: PubMed Central journal article supplement (PMC5929188; doi:10.4269/ajtmh.17-0421), 2017-12-26
Supplement: tpmd170421.SD1.pdf [file tpmd170421.SD1.pdf]

SUPPLEMENTAL TABLE 1  
Clinical, epidemiologic, and diagnostic findings from enrolled participants

| Sample ID  | Gender | Age   | Axillary temperature (°C) | Admission | Malaria RDT completed? | RDT result | Microscopy completed? | Microscopy result | AFI TAC completed? | Detection(s) by AFI TAC result | Respiratory TAC completed? | Detection(s) by respiratory TAC                      |
|------------|--------|-------|---------------------------|-----------|------------------------|------------|-----------------------|-------------------|--------------------|--------------------------------|----------------------------|------------------------------------------------------|
| 2014112964 | Male   | 33.55 | 37.5                      | No        | Yes                    | POS        | Yes                   | 4+                | Yes                | None                           | Yes                        | None                                                 |
| 2014112968 | Female | 24.04 | 37.5                      | No        | Yes                    | POS        | Yes                   | 2+                | Yes                | Plasmodium                     | Yes                        | None                                                 |
| 2014112969 | Female | 33.95 | 37.5                      | Yes       | Yes                    | NEG        | No                    | -                 | Yes                | Plasmodium                     | Yes                        | None                                                 |
| 2014112971 | Female | 80    | 37.5                      | No        | Yes                    | NEG        | No                    | -                 | Yes                | None                           | Yes                        | None                                                 |
| 2014112972 | Male   | 23.78 | 37.8                      | Yes       | Yes                    | POS        | Yes                   | 2+                | Yes                | None                           | Yes                        | None                                                 |
| 2014112975 | Male   | 32.03 | 38                        | Yes       | Yes                    | POS        | Yes                   | 4+                | Yes                | Plasmodium                     | Yes                        | None                                                 |
| 2014112976 | Male   | 56.92 | 39.2                      | Yes       | Yes                    | POS        | Yes                   | 4+                | Yes                | Plasmodium                     | Yes                        | None                                                 |
| 2014112981 | Male   | 24.66 | 39                        | Yes       | Yes                    | NEG        | No                    | -                 | Yes                | Plasmodium                     | Yes                        | None                                                 |
| 2014113004 | Male   | 34.84 | 39.8                      | No        | Yes                    | NEG        | No                    | -                 | Yes                | Plasmodium                     | Yes                        | None                                                 |
| 2014113006 | Female | 53.64 | 39                        | Yes       | Yes                    | NEG        | No                    | -                 | Yes                | Plasmodium                     | Yes                        | None                                                 |
| 2014113012 | Female | 41.11 | 37.8                      | Yes       | Yes                    | NEG        | No                    | -                 | Yes                | None                           | Yes                        | None                                                 |
| 2014113069 | Male   | 36.01 | 38                        | Yes       | Yes                    | POS        | Yes                   | 3+                | Yes                | None                           | Yes                        | None                                                 |
| 2014113072 | Female | 6.091 | 38.6                      | Yes       | Yes                    | NEG        | Yes                   | No parasite       | Yes                | Plasmodium                     | Yes                        | Haemophilus influenzae-all types                     |
| 2014113073 | Male   | 24.55 | 38.6                      | Yes       | Yes                    | NEG        | Yes                   | No parasite       | Yes                | Plasmodium                     | Yes                        | Streptococcus pneumoniae                             |
| 2014113074 | Male   | 15.85 | 38.4                      | Yes       | Yes                    | POS        | Yes                   | No parasite       | Yes                | Plasmodium                     | Yes                        | Haemophilus influenzae-all types                     |
| 2014113075 | Male   | 22.03 | 40                        | No        | Yes                    | POS        | Yes                   | No parasite       | Yes                | Plasmodium                     | Yes                        | Haemophilus influenzae-all types                     |
| 2014113076 | Male   | 61.34 | 37.6                      | Yes       | Yes                    | NEG        | No                    | -                 | Yes                | Dengue                         | Yes                        | Staphylococcus aureus                                |
| 2014113077 | Male   | 22.39 | 39.8                      | Yes       | Yes                    | POS        | Yes                   | No parasite       | Yes                | Plasmodium                     | Yes                        | S. pneumoniae                                        |
| 2014113078 | Female | 45.53 | 37.9                      | Yes       | Yes                    | POS        | Yes                   | 2+                | Yes                | None                           | Yes                        | S. pneumoniae                                        |
| 2014113079 | Female | 38.86 | 39.3                      | Yes       | Yes                    | POS        | Yes                   | No parasite       | Yes                | Plasmodium                     | Yes                        | Moraxella catarrhalis                                |
| 2014113080 | Female | 22.52 | 37.5                      | Yes       | Yes                    | POS        | No                    | -                 | Yes                | Plasmodium                     | Yes                        | S. pneumoniae                                        |
| 2014113081 | Female | 19.02 | 40.3                      | No        | Yes                    | POS        | Yes                   | No parasite       | Yes                | Lepto                          | Yes                        | S. pneumoniae                                        |
| 2014113082 | Male   | 26.17 | 39.3                      | No        | Yes                    | NEG        | Yes                   | No parasite       | Yes                | Plasmodium                     | Yes                        | Haemophilus influenzae-all types                     |
| 2014113084 | Male   | 29.5  | 38                        | Yes       | Yes                    | POS        | Yes                   | 3+                | Yes                | Plasmodium                     | Yes                        | Adenovirus                                           |
| 2014113085 | Female | 31.02 | 37.7                      | Yes       | Yes                    | POS        | Yes                   | 2+                | Yes                | Plasmodium                     | Yes                        | S. aureus                                            |
| 2014113086 | Male   | 20.5  | 38                        | Yes       | Yes                    | POS        | Yes                   | 3+                | Yes                | Plasmodium                     | Yes                        | S. pneumoniae                                        |
| 2014113087 | Female | 20.05 | 37.8                      | Yes       | Yes                    | POS        | Yes                   | 4+                | Yes                | Plasmodium + lepto             | Yes                        | Human rhinovirus                                     |
| 2014113088 | Male   | 35.07 | 38                        | Yes       | Yes                    | NEG        | Yes                   | No parasite       | Yes                | Plasmodium                     | Yes                        | S. aureus                                            |
| 2014113089 | Male   | 38.18 | 37.6                      | No        | Yes                    | NEG        | No                    | -                 | Yes                | Plasmodium                     | Yes                        | Haemophilus influenzae-all types + S. pneumoniae     |
| 2014113090 | Male   | 36.3  | 38.8                      | No        | Yes                    | NEG        | No                    | -                 | Yes                | None                           | Yes                        | Group A Streptococcus + S. aureus                    |
| 2014113091 | Male   | 3.712 | 37.7                      | No        | Yes                    | NEG        | No                    | -                 | No                 | None                           | Yes                        | Haemophilus influenzae-all types + S. pneumoniae     |
| 2014113092 | Female | 4.054 | 39.5                      | Yes       | Yes                    | NEG        | Yes                   | No parasite       | Yes                | Plasmodium                     | Yes                        | Haemophilus influenzae-all types + S. pneumoniae     |
| 2014113093 | Male   | 27.59 | 39                        | Yes       | Yes                    | POS        | Yes                   | 4+                | Yes                | None                           | Yes                        | Enterovirus + M. catarrhalis                         |
| 2014113094 | Male   | 1.848 | 37.7                      | Yes       | Yes                    | NEG        | No                    | -                 | Yes                | None                           | Yes                        | Coronavirus 229E + respiratory syncytial virus       |
| 2014113095 | Male   | 15.3  | 38.6                      | No        | Yes                    | POS        | No                    | No parasite       | Yes                | Plasmodium                     | Yes                        | Haemophilus influenzae-all types + S. aureus         |
| 2014113097 | Male   | 22.31 | 38.4                      | Yes       | Yes                    | POS        | Yes                   | No parasite       | Yes                | Plasmodium                     | Yes                        | Haemophilus influenzae-all types + S. pneumoniae     |
| 2014113098 | Male   | 23.67 | 37.6                      | No        | Yes                    | NEG        | No                    | -                 | Yes                | None                           | Yes                        | Haemophilus influenzae-all types + S. pneumoniae     |
| 2014113099 | Male   | 10.53 | 38.2                      | No        | Yes                    | POS        | Yes                   | No parasite       | Yes                | None                           | Yes                        | Group A Streptococcus + S. aureus                    |
| 2014113100 | Female | 43.04 | 37.5                      | No        | Yes                    | NEG        | No                    | -                 | Yes                | None                           | Yes                        | Pseudomonas aeruginosa + respiratory syncytial virus |
| 2014113101 | Male   | 10.78 | 38.5                      | Yes       | Yes                    | POS        | Yes                   | No parasite       | Yes                | Plasmodium                     | Yes                        | Haemophilus influenzae-all types + S. aureus         |

(continued)

SUPPLEMENTAL TABLE 1  
Continued

| Sample ID  | Gender | Age   | Axillary temperature (°C) | Admission | Malaria RDT completed? | RDT result | Microscopy completed? | Microscopy result | AFI TAC completed? | Detection(s) by AFI TAC result | Respiratory TAC completed? | Detection(s) by respiratory TAC                                                                 |
|------------|--------|-------|---------------------------|-----------|------------------------|------------|-----------------------|-------------------|--------------------|--------------------------------|----------------------------|-------------------------------------------------------------------------------------------------|
| 2014113102 | Male   | 31.46 | 40                        | Yes       | Yes                    | POS        | Yes                   | No parasite       | Yes                | <i>Plasmodium</i>              | Yes                        | <i>Haemophilus influenzae</i> -all types + <i>S. pneumoniae</i>                                 |
| 2014113103 | Male   | 21.21 | 38.6                      | No        | Yes                    | NEG        | No                    | -                 | Yes                | <i>Plasmodium</i>              | Yes                        | <i>Haemophilus influenzae</i> -all types + <i>S. pneumoniae</i>                                 |
| 2014113105 | Male   | 32.28 | 38                        | Yes       | Yes                    | POS        | Yes                   | 1+                | Yes                | <i>Plasmodium</i>              | Yes                        | Coronavirus 229E + <i>Haemophilus influenzae</i> -all types                                     |
| 2014113108 | Male   | 25.13 | 39.7                      | No        | Yes                    | NEG        | No                    | -                 | Yes                | None                           | Yes                        | <i>Haemophilus influenzae</i> -all types + <i>S. pneumoniae</i>                                 |
| 2014113109 | Male   | 10.49 | 39.7                      | Yes       | Yes                    | POS        | Yes                   | No parasite       | Yes                | <i>Plasmodium</i>              | Yes                        | <i>Haemophilus influenzae</i> -all types + <i>M. catarrhalis</i>                                |
| 2014113110 | Male   | 22.03 | 39.3                      | Yes       | Yes                    | POS        | No                    | -                 | Yes                | None                           | Yes                        | <i>Haemophilus influenzae</i> -all types + human rhinovirus                                     |
| 2014113111 | Male   | 24.03 | 37.5                      | Yes       | Yes                    | NEG        | No                    | -                 | Yes                | <i>Plasmodium</i>              | Yes                        | Human rhinovirus + <i>S. pneumoniae</i>                                                         |
| 2014113112 | Male   | 22.02 | 38                        | Yes       | Yes                    | NEG        | No                    | -                 | Yes                | <i>Plasmodium</i>              | Yes                        | <i>Haemophilus influenzae</i> -all types + <i>S. pneumoniae</i>                                 |
| 2014113113 | Male   | 27.68 | 38.8                      | No        | Yes                    | POS        | Yes                   | 1+                | Yes                | <i>Plasmodium</i>              | Yes                        | Influenza B + <i>Haemophilus influenzae</i> -all types                                          |
| 2014113114 | Male   | 12.57 | 39.4                      | Yes       | Yes                    | POS        | Yes                   | 1+                | Yes                | <i>Plasmodium</i>              | Yes                        | <i>S. aureus</i> + <i>S. pneumoniae</i>                                                         |
| 2014113115 | Male   | 24.15 | 38                        | Yes       | Yes                    | POS        | Yes                   | 2+                | No                 | None                           | Yes                        | <i>Haemophilus influenzae</i> -type B2 + <i>Klebsiella pneumoniae</i>                           |
| 2014113116 | Male   | 3.646 | 38.8                      | Yes       | Yes                    | NEG        | Yes                   | No parasite       | No                 | None                           | Yes                        | <i>Haemophilus influenzae</i> -all types + <i>S. pneumoniae</i>                                 |
| 2014113117 | Male   | 45.02 | 37.8                      | Yes       | Yes                    | POS        | Yes                   | 1+                | Yes                | None                           | Yes                        | <i>S. aureus</i> Bc + <i>S. pneumoniae</i>                                                      |
| 2014113118 | Male   | 14.2  | 38.3                      | No        | Yes                    | POS        | Yes                   | 2+                | Yes                | None                           | Yes                        | Group A <i>Streptococcus</i> + <i>Psae</i> + <i>S. aureus</i>                                   |
| 2014113119 | Female | 36    | 40                        | Yes       | Yes                    | POS        | Yes                   | No parasite       | Yes                | None                           | Yes                        | Adenovirus + respiratory syncytial virus + <i>S. pneumoniae</i>                                 |
| 2014113121 | Male   | 39.06 | 38.2                      | No        | Yes                    | NEG        | Yes                   | No parasite       | Yes                | <i>Plasmodium</i>              | Yes                        | <i>Haemophilus influenzae</i> -all types + respiratory syncytial virus + <i>S. pneumoniae</i>   |
| 2014113122 | Male   | 26.26 | 38.8                      | No        | Yes                    | NEG        | Yes                   | No parasite       | Yes                | <i>Plasmodium</i>              | Yes                        | Group A <i>Streptococcus</i> + <i>M. catarrhalis</i> + <i>S. pneumoniae</i>                     |
| 2014113123 | Female | 6.967 | 38.3                      | No        | Yes                    | NEG        | Yes                   | No parasite       | Yes                | None                           | Yes                        | <i>Haemophilus influenzae</i> -all types + <i>M. catarrhalis</i> + <i>S. pneumoniae</i>         |
| 2014113124 | Female | 5.913 | 37.6                      | No        | Yes                    | POS        | No                    | -                 | Yes                | None                           | Yes                        | <i>Haemophilus influenzae</i> -all types + <i>M. catarrhalis</i> + <i>S. pneumoniae</i>         |
| 2014113125 | Male   | 12.27 | 40.7                      | Yes       | Yes                    | POS        | Yes                   | No parasite       | Yes                | <i>Plasmodium</i>              | Yes                        | Adenovirus + enterovirus + <i>Haemophilus influenzae</i> -all types                             |
| 2014113126 | Male   | 3.707 | 38                        | No        | Yes                    | POS        | Yes                   | 2+                | Yes                | <i>Plasmodium</i>              | Yes                        | <i>Haemophilus influenzae</i> -all types + <i>M. catarrhalis</i> + <i>S. pneumoniae</i>         |
| 2014113128 | Male   | 24.48 | 39                        | Yes       | Yes                    | NEG        | Yes                   | No parasite       | Yes                | <i>Plasmodium</i>              | Yes                        | <i>Haemophilus influenzae</i> -all types + <i>S. aureus</i> + <i>S. pneumoniae</i>              |
| 2014113129 | Female | 12.85 | 38.1                      | Yes       | Yes                    | POS        | Yes                   | 3+                | Yes                | None                           | Yes                        | <i>M. catarrhalis</i> + respiratory syncytial virus + <i>S. pneumoniae</i>                      |
| 2014113130 | Male   | 14.57 | 38.8                      | No        | Yes                    | POS        | Yes                   | 2+                | Yes                | None                           | Yes                        | Group A <i>Streptococcus</i> + <i>Haemophilus influenzae</i> -all types + <i>M. catarrhalis</i> |
| 2014113131 | Male   | 6.069 | 37.5                      | No        | Yes                    | POS        | Yes                   | 4+                | Yes                | None                           | Yes                        | <i>Haemophilus influenzae</i> -all types + <i>M. catarrhalis</i> + <i>S. pneumoniae</i>         |

(continued)

SUPPLEMENTAL TABLE 1  
Continued

| Sample ID  | Gender | Age   | Axillary temperature (°C) | Admission | Malaria RDT completed? | RDT result | Microscopy completed? | Microscopy result | AFI/TAC completed? | Detection(s) by AFI/TAC result | Respiratory TAC completed? | Detection(s) by respiratory TAC                                                                                        |
|------------|--------|-------|---------------------------|-----------|------------------------|------------|-----------------------|-------------------|--------------------|--------------------------------|----------------------------|------------------------------------------------------------------------------------------------------------------------|
| 2014113133 | Male   | 47    | 39.4                      | Yes       | Yes                    | NEG        | Yes                   | No parasite       | Yes                | <i>Plasmodium</i>              | Yes                        | <i>Haemophilus influenzae</i> -all types + <i>P. aeruginosa</i> + <i>S. pneumoniae</i>                                 |
| 2014113134 | Male   | 33.28 | 39.3                      | No        | Yes                    | POS        | Yes                   | 2+                | Yes                | <i>Plasmodium</i>              | Yes                        | Group A <i>Streptococcus</i> + <i>Haemophilus influenzae</i> -all types + <i>S. aureus</i>                             |
| 2014113135 | Male   | 19.4  | 38.3                      | Yes       | Yes                    | NEG        | No                    | -                 | Yes                | None                           | Yes                        | Influenza B + <i>Haemophilus influenzae</i> -all types + <i>S. pneumoniae</i>                                          |
| 2014113136 | Female | 3.874 | 37.5                      | No        | Yes                    | POS        | Yes                   | 2+                | Yes                | None                           | Yes                        | Adenovirus + <i>Haemophilus influenzae</i> -all types + <i>M. catarrhalis</i>                                          |
| 2014113137 | Female | 5.42  | 38.1                      | No        | Yes                    | NEG        | No                    | -                 | Yes                | None                           | Yes                        | Influenza B + <i>M. catarrhalis</i> + <i>S. pneumoniae</i>                                                             |
| 2014113138 | Female | 21.02 | 38                        | Yes       | Yes                    | POS        | Yes                   | No parasite       | Yes                | <i>Plasmodium</i>              | Yes                        | <i>Haemophilus influenzae</i> -all types + <i>M. catarrhalis</i> + human rhinovirus                                    |
| 2014113139 | Female | 31.35 | 38                        | No        | Yes                    | NEG        | No                    | -                 | Yes                | <i>Plasmodium</i>              | Yes                        | <i>Haemophilus influenzae</i> -all types + <i>M. catarrhalis</i> + <i>S. pneumoniae</i>                                |
| 2014113140 | Female | 2.346 | 38.7                      | Yes       | Yes                    | POS        | Yes                   | 3+                | Yes                | None                           | Yes                        | <i>Haemophilus influenzae</i> -all types + <i>M. catarrhalis</i> + <i>S. pneumoniae</i>                                |
| 2014113142 | Female | 16.15 | 37.5                      | No        | Yes                    | POS        | Yes                   | No parasite       | Yes                | None                           | Yes                        | Group A <i>Streptococcus</i> + <i>Haemophilus influenzae</i> -all types + human rhinovirus                             |
| 2014113143 | Male   | 1.826 | 39                        | Yes       | Yes                    | POS        | Yes                   | No parasite       | No                 | None                           | Yes                        | Adenovirus + <i>Haemophilus influenzae</i> -all types + <i>M. catarrhalis</i>                                          |
| 2014113144 | Male   | 2.08  | 37.5                      | No        | Yes                    | POS        | Yes                   | No parasite       | Yes                | None                           | Yes                        | Human rhinovirus + <i>S. aureus</i> + <i>S. pneumoniae</i>                                                             |
| 2014113145 | Female | 79.01 | 39.1                      | Yes       | Yes                    | NEG        | No                    | -                 | Yes                | <i>Plasmodium</i>              | Yes                        | <i>Haemophilus influenzae</i> -all types + <i>P. aeruginosa</i> + respiratory syncytial virus                          |
| 2014113146 | Male   | 31.37 | 37.8                      | No        | Yes                    | POS        | Yes                   | 2+                | Yes                | <i>Plasmodium</i>              | Yes                        | Group A <i>Streptococcus</i> + <i>Haemophilus influenzae</i> -all types + <i>M. catarrhalis</i> + <i>S. pneumoniae</i> |
| 2014113147 | Male   | 1.702 | 38.2                      | No        | Yes                    | POS        | Yes                   | No parasite       | Yes                | None                           | Yes                        | Enterovirus + Coronavirus 229E + <i>Haemophilus influenzae</i> -all types + <i>M. catarrhalis</i>                      |
| 2014113149 | Male   | 3.107 | 39.6                      | Yes       | Yes                    | POS        | Yes                   | 2+                | Yes                | <i>Plasmodium</i>              | Yes                        | Coronavirus 229E + <i>Haemophilus influenzae</i> -all types + <i>S. aureus</i> + <i>S. pneumoniae</i>                  |
| 2014113150 | Male   | 2.012 | 39.3                      | No        | Yes                    | POS        | Yes                   | 4+                | Yes                | None                           | Yes                        | <i>Haemophilus influenzae</i> -all types + <i>M. catarrhalis</i> + parainfluenza virus 1 + <i>S. pneumoniae</i>        |
| 2014113151 | Female | 10.03 | 38                        | No        | Yes                    | POS        | Yes                   | 4+                | Yes                | <i>Plasmodium</i>              | Yes                        | Coronavirus 229E + <i>Haemophilus influenzae</i> -all types + <i>M. catarrhalis</i> + <i>S. pneumoniae</i>             |
| 2014113152 | Male   | 9.382 | 37.6                      | No        | Yes                    | POS        | Yes                   | 2+                | Yes                | None                           | Yes                        | <i>Haemophilus influenzae</i> -all types + respiratory syncytial virus + <i>S. aureus</i> + <i>S. pneumoniae</i>       |
| 2014113153 | Male   | 6.201 | 40.2                      | Yes       | Yes                    | POS        | Yes                   | 1+                | Yes                | <i>Plasmodium</i>              | Yes                        | <i>Haemophilus influenzae</i> -all types + <i>M. catarrhalis</i> + <i>P. aeruginosa</i> + <i>S. pneumoniae</i>         |
| 2014113154 | Female | 1.333 | 37.8                      | No        | Yes                    | POS        | Yes                   | 2+                | Yes                | None                           | Yes                        | Group A <i>Streptococcus</i> + <i>Haemophilus influenzae</i> -all types + <i>M. catarrhalis</i> + <i>S. aureus</i>     |

(continued)

SUPPLEMENTAL TABLE 1  
Continued

| Sample ID  | Gender | Age   | Axillary temperature (°C) | Admission | Malaria RDT completed? | RDT result | Microscopy completed? | Microscopy result | AFI/TAC completed? | Detection(s) by AFI/TAC result | Respiratory TAC completed? | Detection(s) by respiratory TAC                                                                                                                           |
|------------|--------|-------|---------------------------|-----------|------------------------|------------|-----------------------|-------------------|--------------------|--------------------------------|----------------------------|-----------------------------------------------------------------------------------------------------------------------------------------------------------|
| 2014113155 | Male   | 7.69  | 37.6                      | No        | Yes                    | NEG        | No                    | -                 | Yes                | None                           | Yes                        | <i>Haemophilus influenzae</i> -all types + <i>Haemophilus influenzae</i> -type B1 + <i>M. catarrhalis</i> + <i>S. pneumoniae</i>                          |
| 2014113156 | Male   | 25.07 | 38.4                      | No        | Yes                    | POS        | Yes                   | No parasite       | Yes                | None                           | Yes                        | Group A <i>Streptococcus</i> + <i>Haemophilus influenzae</i> -all types + <i>S. aureus</i> + <i>S. pneumoniae</i>                                         |
| 2014113157 | Male   | 6.329 | 38                        | No        | Yes                    | POS        | Yes                   | 1+                | Yes                | <i>Plasmodium</i>              | Yes                        | <i>Haemophilus influenzae</i> -all types + <i>M. catarrhalis</i> + human rhinovirus + <i>S. pneumoniae</i>                                                |
| 2014113158 | Male   | 23.5  | 39                        | Yes       | Yes                    | NEG        | Yes                   | No parasite       | Yes                | <i>Plasmodium</i>              | Yes                        | <i>Haemophilus influenzae</i> -all types + <i>K. pneumoniae</i>                                                                                           |
| 2014113159 | Male   | 3.874 | 37.7                      | No        | Yes                    | POS        | Yes                   | 2+                | Yes                | None                           | Yes                        | <i>Haemophilus influenzae</i> -all types + <i>S. pneumoniae</i> + <i>S. aureus</i> + <i>S. pneumoniae</i>                                                 |
| 2014113160 | Female | 33.19 | 37.5                      | No        | Yes                    | POS        | Yes                   | 1+                | Yes                | None                           | Yes                        | Adenovirus + <i>Haemophilus influenzae</i> -all types + <i>M. catarrhalis</i> + respiratory syncytial virus                                               |
| 2014113161 | Female | 5.995 | 40.2                      | Yes       | Yes                    | NEG        | Yes                   | No parasite       | Yes                | None                           | Yes                        | Adenovirus + Hcv2 + <i>Haemophilus influenzae</i> -all types + <i>P. aeruginosa</i>                                                                       |
| 2014113162 | Male   | 10.07 | 37.5                      | No        | Yes                    | POS        | Yes                   | 3+                | Yes                | None                           | Yes                        | <i>Haemophilus influenzae</i> -all types + <i>M. catarrhalis</i> + <i>S. aureus</i> + <i>S. pneumoniae</i>                                                |
| 2014113163 | Male   | 29.85 | 39                        | Yes       | Yes                    | POS        | Yes                   | No parasite       | Yes                | <i>Plasmodium</i>              | Yes                        | Group A <i>Streptococcus</i> + <i>M. catarrhalis</i> + human rhinovirus + <i>S. pneumoniae</i>                                                            |
| 2014113164 | Male   | 8.449 | 38.2                      | No        | Yes                    | POS        | Yes                   | 2+                | Yes                | <i>Plasmodium</i>              | Yes                        | Group A <i>Streptococcus</i> + coronavirus 229E + <i>Haemophilus influenzae</i> -all types + <i>S. pneumoniae</i>                                         |
| 2014113168 | Male   | 3.025 | 39                        | Yes       | Yes                    | POS        | Yes                   | 3+                | Yes                | None                           | Yes                        | Enterovirus + <i>Haemophilus influenzae</i> -all types + human rhinovirus + <i>S. aureus</i>                                                              |
| 2014113169 | Male   | 1.697 | 38.6                      | No        | Yes                    | NEG        | Yes                   | No parasite       | No                 | None                           | Yes                        | Enterovirus + <i>M. catarrhalis</i> + respiratory syncytial virus + <i>S. pneumoniae</i>                                                                  |
| 2014113171 | Male   | 20.65 | 38.6                      | No        | Yes                    | POS        | Yes                   | No parasite       | Yes                | None                           | Yes                        | Adenovirus + <i>Haemophilus influenzae</i> -all types + <i>M. catarrhalis</i> + <i>S. pneumoniae</i>                                                      |
| 2014113172 | Male   | 30.96 | 39.6                      | Yes       | Yes                    | POS        | Yes                   | No parasite       | Yes                | None                           | Yes                        | Adenovirus + group A <i>Streptococcus</i> + <i>Haemophilus influenzae</i> -all types + <i>S. aureus</i>                                                   |
| 2014113173 | Female | 2.647 | 37.7                      | Yes       | Yes                    | NEG        | No                    | -                 | No                 | None                           | Yes                        | <i>Haemophilus influenzae</i> -all types + <i>M. catarrhalis</i> + <i>S. pneumoniae</i>                                                                   |
| 2014113174 | Female | 7.917 | 38                        | Yes       | Yes                    | NEG        | Yes                   | No parasite       | Yes                | None                           | Yes                        | Adenovirus + <i>Haemophilus influenzae</i> -all types + <i>M. catarrhalis</i> + <i>S. pneumoniae</i>                                                      |
| 2014113176 | Male   | 21.44 | 38.8                      | Yes       | Yes                    | NEG        | No                    | -                 | Yes                | <i>Plasmodium</i>              | Yes                        | Adenovirus + <i>Haemophilus influenzae</i> -all types + <i>S. pneumoniae</i>                                                                              |
| 2014113177 | Female | 1.995 | 37.5                      | No        | Yes                    | NEG        | No                    | -                 | Yes                | None                           | Yes                        | Coronavirus 229E + <i>Haemophilus influenzae</i> -all types + <i>Haemophilus influenzae</i> -type B1 + respiratory syncytial virus + <i>S. pneumoniae</i> |

(continued)

SUPPLEMENTAL TABLE 1  
Continued

| Sample ID   | Gender | Age   | Axillary temperature (°C) | Admission | Malaria RDT completed? | RDT result | Microscopy completed? | Microscopy result | AFI TAC completed? | Detection(s) by AFI TAC result | Respiratory TAC completed? | Detection(s) by respiratory TAC                                                                                                                                    |
|-------------|--------|-------|---------------------------|-----------|------------------------|------------|-----------------------|-------------------|--------------------|--------------------------------|----------------------------|--------------------------------------------------------------------------------------------------------------------------------------------------------------------|
| 2014113191  | Female | 4.26  | 38.6                      | No        | Yes                    | POS        | Yes                   | No parasite       | Yes                | <i>Plasmodium</i>              | Yes                        | Influenza B + <i>Haemophilus influenzae</i> -all types + <i>Haemophilus influenzae</i> -type B1 + <i>M. catarrhalis</i> + <i>S. pneumoniae</i>                     |
| 2014113193  | Male   | 2.743 | 37.8                      | Yes       | Yes                    | NEG        | Yes                   | No parasite       | Yes                | <i>Plasmodium</i>              | Yes                        | Group A <i>Streptococcus</i> + <i>Haemophilus influenzae</i> -all types + <i>M. catarrhalis</i> + respiratory syncytial virus + <i>S. pneumoniae</i>               |
| 2014113195  | Male   | 6.746 | 39.1                      | Yes       | Yes                    | POS        | Yes                   | No parasite       | Yes                | <i>Plasmodium</i>              | Yes                        | Adenovirus + <i>Haemophilus influenzae</i> -all types + <i>M. catarrhalis</i> + human rhinovirus + <i>S. pneumoniae</i>                                            |
| 2014113206  | Female | 4.235 | 38                        | Yes       | Yes                    | POS        | Yes                   | 4+                | Yes                | <i>Plasmodium</i>              | Yes                        | Enterovirus + group A <i>Streptococcus</i> + <i>Haemophilus influenzae</i> -all types + <i>M. catarrhalis</i> + <i>S. pneumoniae</i>                               |
| 2014113207  | Female | 6.913 | 38.5                      | Yes       | Yes                    | POS        | Yes                   | 2+                | Yes                | <i>Plasmodium</i>              | Yes                        | Adenovirus + group A <i>Streptococcus</i> + <i>Haemophilus influenzae</i> -all types + <i>M. catarrhalis</i> + <i>S. pneumoniae</i>                                |
| 2014113208  | Female | 5.037 | 39.2                      | Yes       | Yes                    | NEG        | No                    | -                 | Yes                | <i>Plasmodium</i>              | Yes                        | Group A <i>Streptococcus</i> + <i>Haemophilus influenzae</i> -all types + <i>M. catarrhalis</i> + human rhinovirus + <i>S. pneumoniae</i>                          |
| 2014113209  | Female | 3.542 | 38.2                      | Yes       | Yes                    | POS        | Yes                   | 3+                | Yes                | <i>Plasmodium</i>              | Yes                        | <i>Haemophilus influenzae</i> -all types + <i>M. catarrhalis</i> + respiratory syncytial virus + human rhinovirus + <i>S. pneumoniae</i>                           |
| 2014113210  | Male   | 3.509 | 37.6                      | No        | Yes                    | POS        | Yes                   | 3+                | Yes                | None                           | Yes                        | Enterovirus + <i>Haemophilus influenzae</i> -all types + <i>M. catarrhalis</i> + <i>S. aureus</i> + <i>S. pneumoniae</i>                                           |
| 2014113211  | Male   | 2.573 | 37.9                      | Yes       | Yes                    | POS        | Yes                   | 3+                | No                 | None                           | Yes                        | Group A <i>Streptococcus</i> + <i>Haemophilus influenzae</i> -all types + <i>M. catarrhalis</i> + human rhinovirus + <i>S. pneumoniae</i>                          |
| 20141129622 | Female | 17.6  | 38.3                      | Yes       | Yes                    | POS        | Yes                   | 3+                | Yes                | None                           | Yes                        | Adenovirus + <i>Haemophilus influenzae</i> -all types + <i>M. catarrhalis</i> + <i>S. aureus</i> + <i>S. pneumoniae</i>                                            |
| 20141129652 | Male   | 13.67 | 37.6                      | No        | Yes                    | POS        | Yes                   | 3+                | Yes                | <i>Plasmodium</i>              | Yes                        | Coronavirus 229E + <i>Haemophilus influenzae</i> -all types + <i>Haemophilus influenzae</i> -type B1 + <i>M. catarrhalis</i> + <i>S. pneumoniae</i>                |
| 20141129662 | Male   | 13.36 | 37.6                      | No        | Yes                    | POS        | Yes                   | 3+                | Yes                | None                           | Yes                        | Enterovirus + <i>Haemophilus influenzae</i> -all types + <i>M. catarrhalis</i> + <i>P. aeruginosa</i> + human rhinovirus + <i>S. aureus</i> + <i>S. pneumoniae</i> |
| 20141129660 | Female | 19.16 | 38.4                      | Yes       | Yes                    | NEG        | No                    | -                 | Yes                | <i>Plasmodium</i>              | No                         | -                                                                                                                                                                  |
| 20141129661 | Male   | 21.52 | 38.3                      | No        | Yes                    | NEG        | No                    | -                 | Yes                | <i>Plasmodium</i>              | No                         | -                                                                                                                                                                  |
| 20141129662 | Male   | 43.46 | 37.5                      | No        | Yes                    | POS        | Yes                   | 1+                | Yes                | <i>Plasmodium</i>              | No                         | -                                                                                                                                                                  |
| 20141129663 | Male   | 22.3  | 38.4                      | Yes       | Yes                    | NEG        | No                    | -                 | Yes                | <i>Plasmodium</i>              | No                         | -                                                                                                                                                                  |
| 20141129665 | Male   | 28.12 | 37.7                      | No        | Yes                    | POS        | Yes                   | 2+                | Yes                | <i>Plasmodium</i>              | No                         | -                                                                                                                                                                  |
| 20141129666 | Male   | 5.861 | 38.3                      | Yes       | Yes                    | NEG        | Yes                   | No parasite       | Yes                | <i>Plasmodium</i>              | No                         | -                                                                                                                                                                  |
| 20141129667 | Male   | 32.47 | 39.2                      | No        | Yes                    | POS        | Yes                   | 2+                | Yes                | None                           | No                         | -                                                                                                                                                                  |
| 20141129670 | Female | 60    | 37.7                      | No        | Yes                    | POS        | Yes                   | 4+                | Yes                | None                           | No                         | -                                                                                                                                                                  |
| 2014112973  | Female | 11.45 | 39.6                      | Yes       | Yes                    | NEG        | No                    | -                 | Yes                | <i>Plasmodium</i>              | No                         | -                                                                                                                                                                  |
| 2014112974  | Female | 23    | 38.2                      | Yes       | Yes                    | POS        | Yes                   | 2+                | Yes                | None                           | No                         | -                                                                                                                                                                  |

(continued)

SUPPLEMENTAL TABLE 1  
Continued

| Sample ID  | Gender | Age   | Axillary temperature (°C) | Admission | Malaria RDT completed? | RDT result | Microscopy completed? | Microscopy result | AFI TAC completed? | Detection(s) by AFI TAC result | Respiratory TAC completed? | Detection(s) by respiratory TAC |
|------------|--------|-------|---------------------------|-----------|------------------------|------------|-----------------------|-------------------|--------------------|--------------------------------|----------------------------|---------------------------------|
| 2014112977 | Male   | 21    | 38                        | Yes       | Yes                    | NEG        | No                    | -                 | Yes                | Plasmodium                     | No                         | -                               |
| 2014112979 | Male   | 39.47 | 39                        | No        | Yes                    | NEG        | No                    | -                 | Yes                | None                           | No                         | -                               |
| 2014112983 | Male   | 19.7  | 38.1                      | Yes       | Yes                    | NEG        | No                    | -                 | Yes                | None                           | No                         | -                               |
| 2014112984 | Male   | 20.07 | 38.5                      | No        | Yes                    | NEG        | No                    | -                 | Yes                | None                           | No                         | -                               |
| 2014112985 | Male   | 27.69 | 39                        | Yes       | Yes                    | POS        | Yes                   | 4+                | Yes                | Plasmodium                     | No                         | -                               |
| 2014112986 | Male   | 20.87 | 39                        | Yes       | Yes                    | NEG        | No                    | -                 | Yes                | None                           | No                         | -                               |
| 2014112987 | Female | 33.28 | 37.5                      | No        | Yes                    | POS        | Yes                   | 4+                | Yes                | None                           | No                         | -                               |
| 2014112989 | Male   | 29.76 | 39.5                      | Yes       | Yes                    | NEG        | No                    | -                 | Yes                | Plasmodium                     | No                         | -                               |
| 2014112990 | Male   | 41.24 | 38                        | Yes       | Yes                    | POS        | Yes                   | 1+                | Yes                | Plasmodium                     | No                         | -                               |
| 2014112991 | Male   | 36.61 | 38.1                      | Yes       | Yes                    | POS        | Yes                   | 2+                | Yes                | None                           | No                         | -                               |
| 2014112992 | Female | 1.99  | 39.5                      | Yes       | Yes                    | POS        | Yes                   | 3+                | No                 | None                           | No                         | -                               |
| 2014112993 | Female | 8.314 | 37.7                      | Yes       | Yes                    | POS        | Yes                   | No parasite       | No                 | None                           | No                         | -                               |
| 2014112994 | Male   | 23.94 | 38.6                      | No        | Yes                    | NEG        | No                    | -                 | Yes                | Plasmodium                     | No                         | -                               |
| 2014112995 | Male   | 54.44 | 39                        | No        | Yes                    | NEG        | No                    | -                 | Yes                | Plasmodium                     | No                         | -                               |
| 2014112996 | Female | 23    | 37.5                      | No        | Yes                    | POS        | Yes                   | 2+                | Yes                | Plasmodium                     | No                         | -                               |
| 2014112999 | Male   | 26.24 | 38.6                      | No        | Yes                    | POS        | No                    | -                 | Yes                | Plasmodium                     | No                         | -                               |
| 2014113000 | Female | 9.01  | 38.5                      | Yes       | Yes                    | POS        | Yes                   | 4+                | Yes                | Plasmodium                     | No                         | -                               |
| 2014113001 | Female | 33.3  | 38.5                      | No        | Yes                    | NEG        | No                    | -                 | Yes                | None                           | No                         | -                               |
| 2014113002 | Male   | 23.92 | 38.9                      | No        | Yes                    | NEG        | No                    | -                 | Yes                | None                           | No                         | -                               |
| 2014113005 | Male   | 40.23 | 40.2                      | Yes       | Yes                    | POS        | Yes                   | 3+                | Yes                | Plasmodium                     | No                         | -                               |
| 2014113007 | Male   | 34.19 | 38.1                      | No        | Yes                    | NEG        | No                    | -                 | Yes                | None                           | No                         | -                               |
| 2014113009 | Female | 51.01 | 39.9                      | No        | Yes                    | POS        | Yes                   | 3+                | Yes                | Plasmodium                     | No                         | -                               |
| 2014113010 | Female | 50.04 | 39.9                      | Yes       | Yes                    | NEG        | No                    | -                 | Yes                | Plasmodium                     | No                         | -                               |
| 2014113011 | Female | 47.01 | 37.5                      | No        | Yes                    | NEG        | No                    | -                 | Yes                | Plasmodium                     | No                         | -                               |
| 2014113013 | Male   | 37.59 | 37.5                      | No        | Yes                    | POS        | Yes                   | No parasite       | Yes                | None                           | No                         | -                               |
| 2014113014 | Male   | 39.27 | 38.2                      | Yes       | Yes                    | NEG        | No                    | -                 | Yes                | None                           | No                         | -                               |
| 2014113015 | Male   | 21.96 | 37.8                      | No        | Yes                    | NEG        | No                    | -                 | Yes                | None                           | No                         | -                               |
| 2014113016 | Female | 1.251 | 38.6                      | No        | Yes                    | NEG        | No                    | -                 | No                 | None                           | No                         | -                               |
| 2014113017 | Male   | 46.57 | 38                        | No        | Yes                    | POS        | Yes                   | No parasite       | Yes                | None                           | No                         | -                               |
| 2014113018 | Female | 8.81  | 40.4                      | Yes       | Yes                    | NEG        | No                    | -                 | Yes                | Plasmodium                     | No                         | -                               |
| 2014113019 | Female | 1.3   | 38.1                      | No        | Yes                    | NEG        | No                    | -                 | No                 | None                           | No                         | -                               |
| 2014113020 | Male   | 32.41 | 37.9                      | No        | Yes                    | NEG        | No                    | -                 | Yes                | None                           | No                         | -                               |
| 2014113021 | Female | 74.03 | 38.9                      | Yes       | Yes                    | POS        | Yes                   | No parasite       | Yes                | None                           | No                         | -                               |
| 2014113022 | Female | 25.84 | 37.5                      | No        | Yes                    | POS        | Yes                   | No parasite       | Yes                | Plasmodium                     | No                         | -                               |
| 2014113023 | Female | 23.71 | 38.3                      | Yes       | Yes                    | POS        | Yes                   | 2+                | Yes                | None                           | No                         | -                               |
| 2014113024 | Female | 18.92 | 38.2                      | No        | Yes                    | POS        | Yes                   | 1+                | Yes                | None                           | No                         | -                               |
| 2014113025 | Female | 45.75 | 38                        | Yes       | Yes                    | POS        | Yes                   | No parasite       | Yes                | Plasmodium                     | No                         | -                               |
| 2014113026 | Male   | 13.51 | 37.6                      | Yes       | Yes                    | NEG        | No                    | -                 | Yes                | Plasmodium                     | No                         | -                               |
| 2014113027 | Female | 40.05 | 39.9                      | Yes       | Yes                    | POS        | Yes                   | 2+                | Yes                | Plasmodium                     | No                         | -                               |
| 2014113028 | Male   | 17.64 | 40                        | Yes       | Yes                    | NEG        | No                    | -                 | Yes                | Lepto                          | No                         | -                               |
| 2014113029 | Female | 4.098 | 37.8                      | Yes       | Yes                    | POS        | Yes                   | 2+                | Yes                | Plasmodium                     | No                         | -                               |
| 2014113030 | Male   | 34.49 | 39                        | Yes       | Yes                    | NEG        | No                    | -                 | Yes                | None                           | No                         | -                               |
| 2014113031 | Female | 21.82 | 38                        | Yes       | Yes                    | POS        | No                    | -                 | Yes                | None                           | No                         | -                               |
| 2014113032 | Female | 24.44 | 37.5                      | No        | Yes                    | POS        | Yes                   | 4+                | Yes                | Plasmodium                     | No                         | -                               |
| 2014113033 | Female | 33.67 | 39                        | Yes       | Yes                    | NEG        | No                    | -                 | Yes                | None                           | No                         | -                               |
| 2014113034 | Male   | 12.12 | 38                        | Yes       | Yes                    | POS        | Yes                   | 4+                | Yes                | Plasmodium                     | No                         | -                               |
| 2014113035 | Male   | 5.07  | 38.6                      | Yes       | Yes                    | NEG        | No                    | -                 | Yes                | Plasmodium                     | No                         | -                               |
| 2014113036 | Male   | 1.713 | 38.5                      | Yes       | Yes                    | POS        | Yes                   | 4+                | Yes                | None                           | No                         | -                               |
| 2014113037 | Male   | 1.147 | 38.4                      | Yes       | Yes                    | NEG        | No                    | -                 | No                 | None                           | No                         | -                               |

(continued)

SUPPLEMENTAL TABLE 1  
Continued

| Sample ID  | Gender | Age   | Axillary temperature (°C) | Admission | Malaria RDT completed? | RDT result | Microscopy completed? | Microscopy result | AFI TAC completed? | Detection(s) by AFI TAC result | Respiratory TAC completed? | Detection(s) by respiratory TAC |
|------------|--------|-------|---------------------------|-----------|------------------------|------------|-----------------------|-------------------|--------------------|--------------------------------|----------------------------|---------------------------------|
| 2014113039 | Female | 24.3  | 37.6                      | Yes       | Yes                    | POS        | Yes                   | No parasite       | Yes                | None                           | No                         | -                               |
| 2014113040 | Female | 62.04 | 37.9                      | Yes       | Yes                    | NEG        | No                    | -                 | Yes                | None                           | No                         | -                               |
| 2014113041 | Female | 34.96 | 38.4                      | No        | Yes                    | POS        | No                    | -                 | Yes                | None                           | No                         | -                               |
| 2014113042 | Male   | 30.05 | 38.3                      | No        | Yes                    | POS        | Yes                   | 2+                | Yes                | None                           | No                         | -                               |
| 2014113043 | Male   | 41.8  | 39                        | No        | Yes                    | POS        | Yes                   | 4+                | Yes                | Plasmodium                     | No                         | -                               |
| 2014113044 | Female | 33.04 | 38.1                      | No        | Yes                    | NEG        | No                    | -                 | Yes                | None                           | No                         | -                               |
| 2014113045 | Male   | 48.04 | 37.9                      | Yes       | Yes                    | POS        | Yes                   | 2+                | Yes                | Plasmodium                     | No                         | -                               |
| 2014113046 | Male   | 25.48 | 40                        | Yes       | Yes                    | NEG        | No                    | -                 | Yes                | Plasmodium                     | No                         | -                               |
| 2014113047 | Male   | 30.13 | 38.8                      | No        | Yes                    | NEG        | No                    | -                 | Yes                | Plasmodium                     | No                         | -                               |
| 2014113048 | Male   | 28.25 | 38.2                      | Yes       | Yes                    | NEG        | Yes                   | No parasite       | Yes                | Plasmodium                     | No                         | -                               |
| 2014113049 | Male   | 23.32 | 40.1                      | Yes       | Yes                    | POS        | Yes                   | 3+                | Yes                | Plasmodium                     | No                         | -                               |
| 2014113050 | Male   | 23.52 | 38.5                      | Yes       | Yes                    | NEG        | No                    | -                 | Yes                | Plasmodium                     | No                         | -                               |
| 2014113051 | Male   | 29.73 | 39.3                      | Yes       | Yes                    | NEG        | No                    | -                 | Yes                | Plasmodium                     | No                         | -                               |
| 2014113052 | Male   | 24.21 | 39                        | Yes       | Yes                    | NEG        | No                    | -                 | Yes                | Plasmodium                     | No                         | -                               |
| 2014113053 | Male   | 23.19 | 37.5                      | Yes       | Yes                    | NEG        | No                    | -                 | Yes                | None                           | No                         | -                               |
| 2014113054 | Male   | 20.91 | 38                        | Yes       | Yes                    | POS        | Yes                   | No parasite       | Yes                | None                           | No                         | -                               |
| 2014113055 | Male   | 19.49 | 38.1                      | Yes       | Yes                    | POS        | Yes                   | 1+                | Yes                | Plasmodium                     | No                         | -                               |
| 2014113056 | Male   | 26.27 | 38.7                      | Yes       | Yes                    | POS        | Yes                   | 2+                | Yes                | Plasmodium                     | No                         | -                               |
| 2014113059 | Male   | 49.53 | 37.5                      | No        | Yes                    | NEG        | No                    | -                 | Yes                | Plasmodium                     | No                         | -                               |
| 2014113060 | Male   | 1.815 | 39.6                      | Yes       | Yes                    | POS        | Yes                   | 1+                | Yes                | None                           | No                         | -                               |
| 2014113061 | Male   | 6.067 | 38.1                      | Yes       | Yes                    | NEG        | No                    | -                 | Yes                | Plasmodium                     | No                         | -                               |
| 2014113062 | Male   | 4.38  | 38.9                      | Yes       | Yes                    | POS        | Yes                   | 2+                | Yes                | Plasmodium                     | No                         | -                               |
| 2014113063 | Male   | 4.796 | 40                        | Yes       | Yes                    | POS        | Yes                   | 3+                | Yes                | Plasmodium                     | No                         | -                               |
| 2014113064 | Male   | 32.85 | 39.5                      | No        | Yes                    | POS        | Yes                   | 2+                | Yes                | Plasmodium                     | No                         | -                               |
| 2014113065 | Female | 48.61 | 37.6                      | No        | Yes                    | POS        | Yes                   | 2+                | Yes                | None                           | No                         | -                               |
| 2014113066 | Male   | 34.9  | 38                        | No        | Yes                    | POS        | Yes                   | 4+                | Yes                | Plasmodium                     | No                         | -                               |
| 2014113067 | Male   | 60.02 | 38.5                      | Yes       | Yes                    | NEG        | No                    | -                 | Yes                | Plasmodium                     | No                         | -                               |
| 2014113068 | Male   | 57.03 | 37.5                      | No        | Yes                    | NEG        | No                    | -                 | Yes                | Plasmodium                     | No                         | -                               |
| 2014113070 | Female | 6.017 | 38                        | Yes       | Yes                    | NEG        | No                    | -                 | No                 | None                           | No                         | -                               |
| 2014113071 | Male   | 24.23 | 38                        | No        | Yes                    | POS        | Yes                   | 2+                | No                 | None                           | No                         | -                               |

AFI = acute febrile illness; TAC = TaqMan array cards.
